# Supplementary material for: Combinatory Effects of Cerium Dioxide Nanoparticles and Acetaminophen on the Liver—A Case Study of Low-Dose Interactions in Human HuH-7 Cells
Source: MDPI journal article supplement (doi:10.3390/ijms22136866), 2021-06-25
Supplement: s1 [file s1]

## Electronic Supplementary Information

ESI 1: Constituents of different COMET assay buffers.

| buffer                        | substance                                                                                  | Weight or volume                                                                                                                                                                                                    |
|-------------------------------|--------------------------------------------------------------------------------------------|---------------------------------------------------------------------------------------------------------------------------------------------------------------------------------------------------------------------|
| Lysis buffer (2 l)            | NaCl<br>Na <sub>2</sub> EDTA<br>TRIS<br>H <sub>2</sub> O<br>NaOH<br>DMSO<br>TritonX        | 292.2 g (=2.5 mol l <sup>-1</sup> )<br>74.4 g (=100 mmol l <sup>-1</sup> )<br>2.4 g (=8.25 mmol l <sup>-1</sup> )<br>1800 ml<br>15.5 g (=ca. 200 mmol l <sup>-1</sup> )<br>200 ml (=10% (v/v))<br>20 ml (=1% (v/v)) |
| Electrophoresis buffer (20 l) | Na <sub>2</sub> EDTA<br>NaOH<br>Na <sub>2</sub> EDTA<br>NaOH<br>deionized H <sub>2</sub> O | 74.4g (=200 mmol l <sup>-1</sup> )<br>400 g (=10 mol l <sup>-1</sup> )<br>100 ml (=1 mmol l <sup>-1</sup> )<br>600 ml (=300 mmol l <sup>-1</sup> )<br>20 l                                                          |
| Neutralization buffer (2 l)   | TRIS<br>HCl37%<br>H <sub>2</sub> O<br>HCl/NaOH                                             | 97.0 g (=400 mmol l <sup>-1</sup> )<br>58 ml (=ca. 1%)<br>2 l<br>For pH adjustment                                                                                                                                  |
| TE-buffer                     | TRIS<br>EDTA<br>deionized H <sub>2</sub> O VE<br>HCl/NaOH                                  | 1.21 g (=10 mmol l <sup>-1</sup> )<br>0.372 g (=1,3 mmol l <sup>-1</sup> )<br>1 l<br>For pH adjustment                                                                                                              |

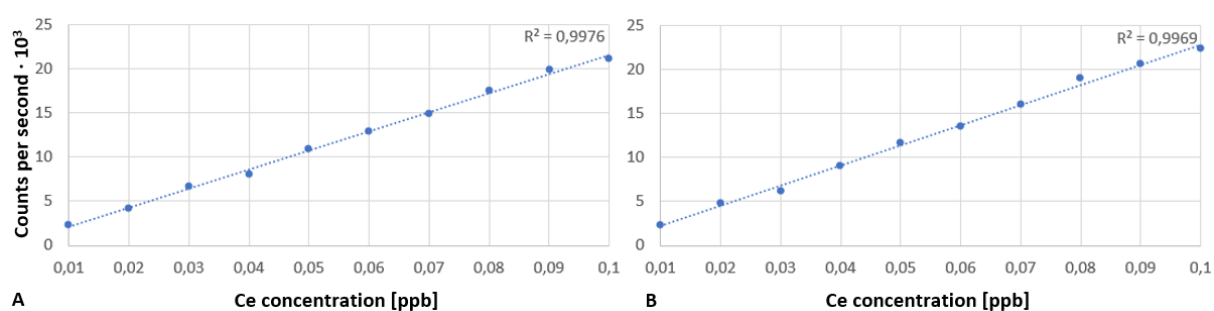

ESI 2: Calibration curves of the concentration of ionic Ce standard in the range 0.01-0.1 ppb. (A) 0.5 mmol APAP in DMEM; (B) 50 mmol/l in DMEM.

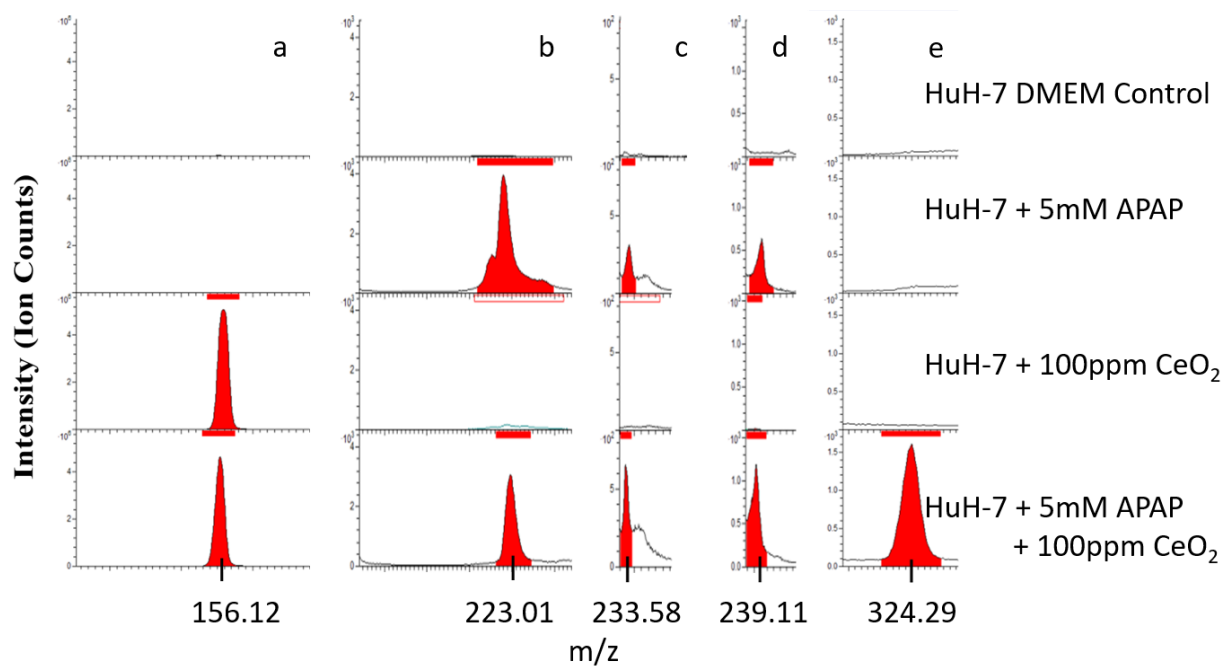

ESI 3: ToF-SIMS mass spectrum (positive ion mode), showing the CeO<sub>2</sub> peak (a,  $m/z$  156.12), the APAP-FeO(OH) peak (b,  $m/z$  223.01), the APAP-Zn(OH)<sub>2</sub> peak (c,  $m/z$  233.58) APAP-MnO(OH)<sub>2</sub> peak (d,  $m/z$  239.11) and the APAP-CeO(OH) peak (e,  $m/z$  324.29) in red color in HuH-7 liver cells. The first row of spectra show unexposed HuH-7 cells, the second row of spectra show HuH-7 liver cells exposed for 24h with 5 mM APAP, the third row of spectra show HuH-7 liver cells exposed for 24h to 100ppm CeO<sub>2</sub> NPs, the fourth row of spectra show HuH-7 liver cells co-exposed for 24h to 5mM APAP and 100ppm CeO<sub>2</sub> NPs. The x-axis displays the molecular weight; the y-axis corresponds to the ion intensities for the peaks.
